# Supplementary material
Source: publisher site journal article supplement (https://www.dovepress.com/article/510594)
Supplement: Supplementary file 1 [file 510594+Supplementary+table.docx]

Supplementary Table 1 Basic characteristics, M-mode parameters of the LV (parasternal short-axis view), and strain parameters of the study groups before T2DM modeling

|  | Con (n = 10) | DM (n = 10) | DMIL (n = 6) | P |
| --- | --- | --- | --- | --- |
| FBG (mmol/l) | 9.65±1.02 | 9.23±1.35 | 9.23±0.73 | 0.428 |
| BW (g) | 18.87±0.56 | 18.76±0.27 | 18.78±0.51 | 0.845 |
| Heart rate (bpm) | 280.00±38.57 | 277.80±27.37 | 300.33±21.70 | 0.351 |
| LVEF (%) | 68.28±3.74 | 67.05±2.83 | 67.46±2.85 | 0.693 |
| FS (%) | 32.70±2.70 | 31.94±2.00 | 32.16±1.97 | 0.751 |
| LVIDd (mm) | 3.05±0.33 | 3.53±0.53 | 3.27±0.37 | 0.058 |
| LVIDs (mm) | 2.04±0.24 | 2.41±0.40 | 2.22±0.29 | 0.053 |
| IVST (mm) | 0.63±0.05 | 0.63±0.07 | 0.58±0.04 | 0.215 |
| PWT (mm) | 0.66±0.07 | 0.68±0.08 | 0.68±0.04 | 0.744 |
| E (cm/s) | 0.63±0.16 | 0.71±0.03 | 0.67±0.11 | 0.294 |
| E/e' | 23.55±6.27 | 23.21±2.11 | 27.50±4.75 | 0.189 |
| Endocardial GLS (%) | 14.32±3.45 | 16.33±2.53 | 15.12±4.06 | 0.402 |
| Mid-myocardial GLS (%) | 12.78±2.60 | 14.04±2.23 | 13.23±3.41 | 0.575 |
| Epicardial GLS (%) | 11.39±1.90 | 12.04±2.15 | 11.60±2.82 | 0.804 |
| Endocardial GCS (%) | 13.81±3.36 | 15.53±4.29 | 18.02±4.55 | 0.150 |
| Mid-myocardial GCS (%) | 9.91±3.23 | 12.63±4.20 | 14.30±3.26 | 0.070 |
| Epicardial GCS (%) | 8.19±3.43 | 10.88±3.79 | 11.95±2.07 | 0.079 |
| GRS (%) | 48.54±21.80 | 50.18±25.85 | 64.39±17.28 | 0.373 |

FBG, fasting blood glucose; BW, body weight; EF, ejection fraction; LVEF, left ventricular ejection fraction; FS, fractional shortening; LVIDd and LVIDs, left ventricular internal dimension in diastole and systole; IVST and PWT, interventricular septum and posterior wall thicknesses at the end-diastole; E, early diastolic filling velocity; E/e', ratio of mitral valve early diastolic maximum velocity to peak mitral annular velocity during early filling; GLS, Global Longitudinal Strain; GCS, Global Circumferential Strain; GRS, Global Radial Strain.
